# Supplementary material for: Rhenium-promoted Pt/WO3/ZrO2: an efficient catalyst for aqueous glycerol hydrogenolysis under reduced H2 pressure
Source: Royal Society of Chemistry journal article supplement (doi:10.1039/c6ra21198d), 2016-01-01
Supplement: c6ra21198d1.pdf [file c6ra21198d1.pdf]

ESI for

# Rhenium-promoted Pt/WO<sub>3</sub>/ZrO<sub>2</sub>: An efficient catalyst for aqueous glycerol hydrogenolysis under reduced H<sub>2</sub> pressure

Qing Tong,<sup>a,b</sup> AnyiZong,<sup>a,b</sup> Wei Gong,<sup>c</sup> Lei Yu,<sup>\*a, d</sup> and Yining Fan<sup>\*a</sup>

<sup>a</sup> Key Laboratory of Mesoscopic Chemistry of MOE, Jiangsu Key Laboratory of Vehicle Emissions Control, Jiangsu Provincial Key Laboratory of Nanotechnology, School of Chemistry and Chemical Engineering, Nanjing University, Nanjing 210093, China. Email: ynfan@nju.edu.cn; Fax: +86-25-83317761; Tel: +86-25-83594620

<sup>b</sup> Nanjing University-Yangzhou Chemistry and Chemical Engineering Institute, Yangzhou, 211400, China.

<sup>c</sup> Jinling College, Nanjing University, Nanjing 210089, China.

<sup>d</sup> School of Chemistry and Chemical Engineering, Yangzhou University, Yangzhou, 225002, China. Email: yulei@yzu.edu.cn.

## CONTENTS

|                                                                                                                                                                                               |    |
|-----------------------------------------------------------------------------------------------------------------------------------------------------------------------------------------------|----|
| 1. Glycerol hydrogenolysis with extended reaction times.....                                                                                                                                  | S2 |
| 2. TEM images of the catalysts.....                                                                                                                                                           | S3 |
| 3. The catalytic performance comparison between 2Pt/WO <sub>3</sub> /ZrO <sub>2</sub> and 1.5Pt-0.8Re/WO <sub>3</sub> /ZrO <sub>2</sub> catalysts.....                                        | S4 |
| 4. Catalytic performance of glycerol hydrogenolysis over 2Pt-Re/WO <sub>3</sub> /ZrO <sub>2</sub> catalysts.....                                                                              | S4 |
| 5. Catalytic performance of glycerol hydrogenolysis over 2Pt-0.8Re/WO <sub>3</sub> /ZrO <sub>2</sub> catalysts under different reaction temperatures.....                                     | S5 |
| 6. Catalytic performance of glycerol hydrogenolysis over 2Pt-0.8Re/WO <sub>3</sub> /ZrO <sub>2</sub> catalysts under different H <sub>2</sub> pressure.....                                   | S5 |
| 7. Catalytic performance of glycerol hydrogenolysis over 2Pt/WO <sub>3</sub> /ZrO <sub>2</sub> and 2Pt-0.8Re/WO <sub>3</sub> /ZrO <sub>2</sub> catalysts under N <sub>2</sub> atmosphere..... | S6 |
| 8. Comparison of the methods.....                                                                                                                                                             | S6 |

## 1. Glycerol hydrogenolysis with extended reaction times

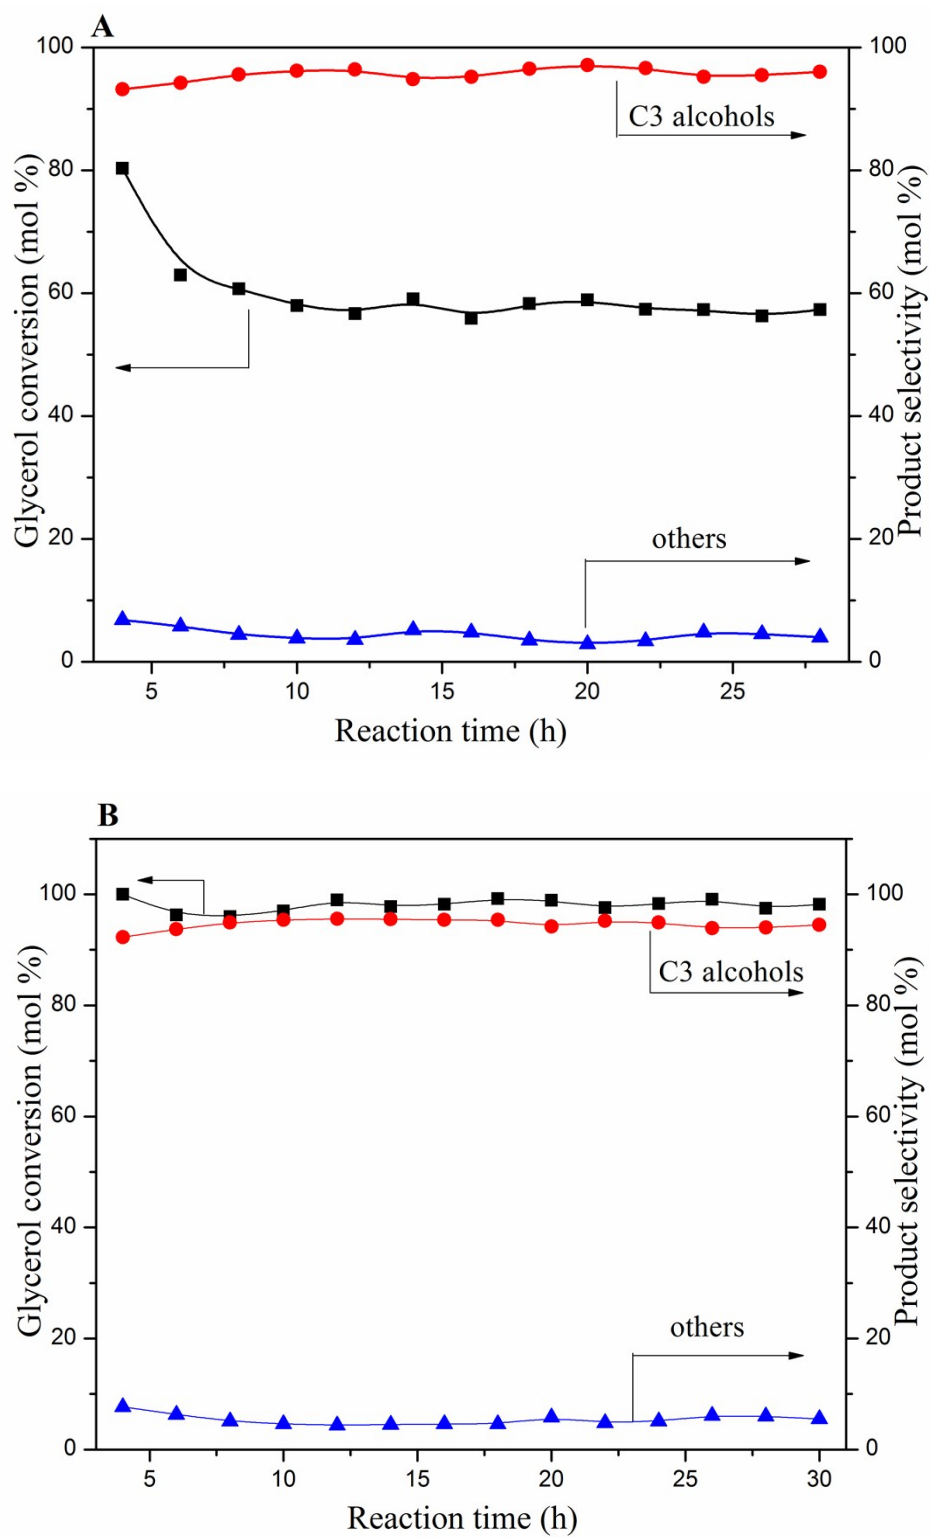

**Figure S1** Catalytic performance of (A) 2%Pt/WO<sub>3</sub>/ZrO<sub>2</sub>, (B) 2%Pt-0.8%Re/WO<sub>3</sub>/ZrO<sub>2</sub> catalysts.

## 2. TEM images of the catalysts

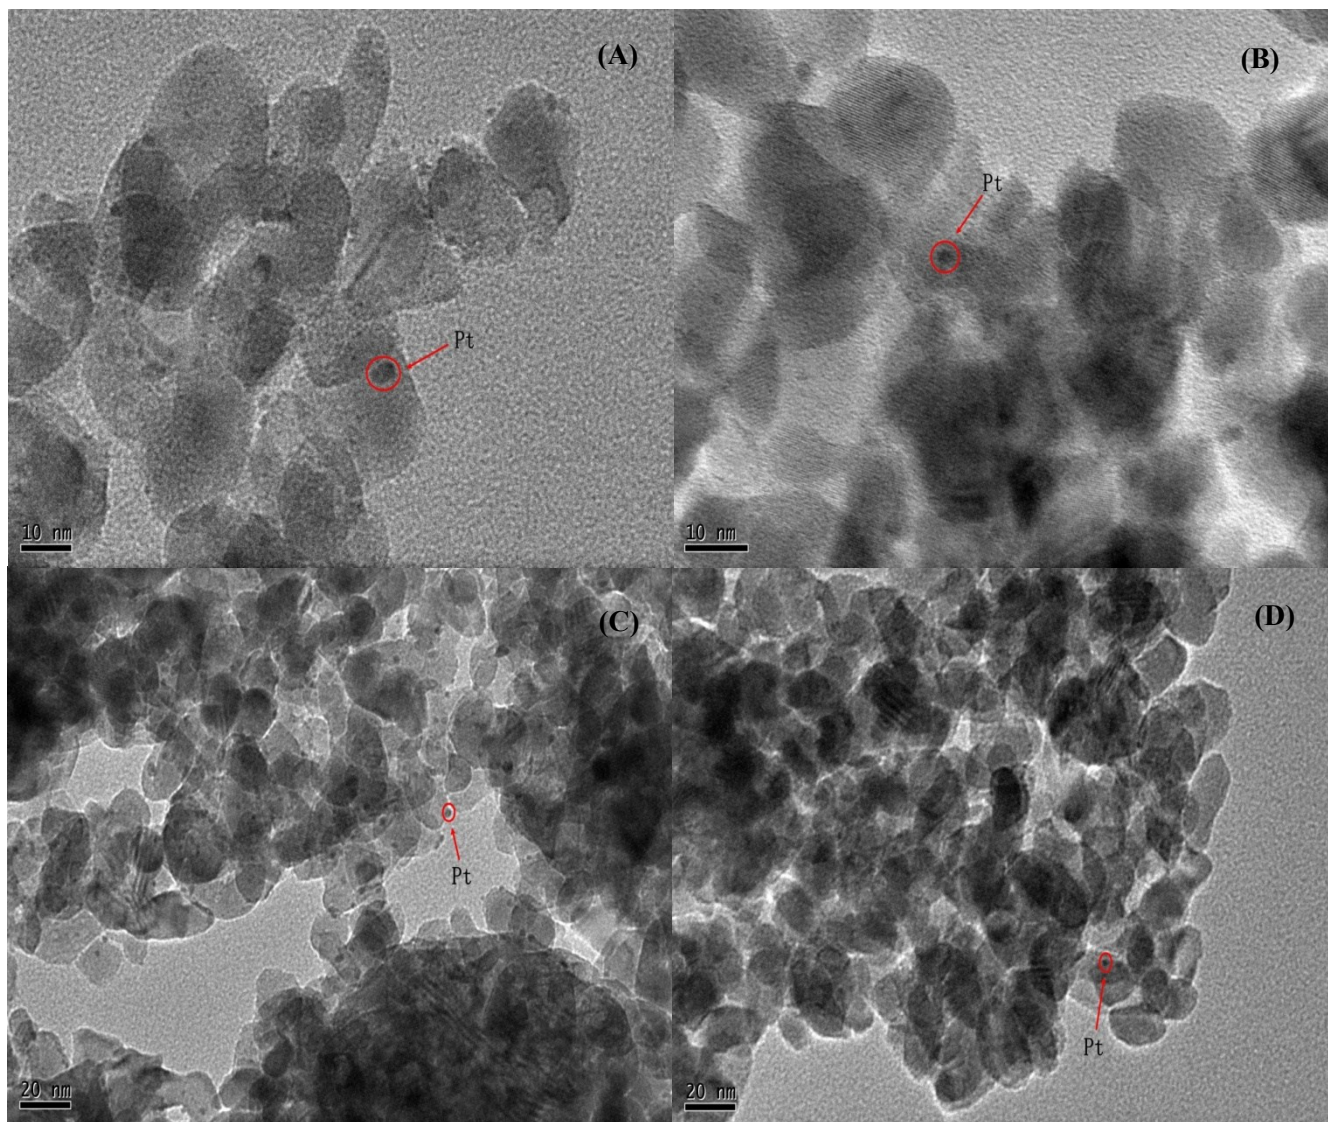

**Figure S2** TEM images of (A) 2 %Pt/WO<sub>3</sub>/ZrO<sub>2</sub> (10 nm), (B) 2 % Pt-0.8 %Re/WO<sub>3</sub>/ZrO<sub>2</sub> (10 nm), (C) 2 % Pt/WO<sub>3</sub>/ZrO<sub>2</sub> (20 nm) , (D) 2 % Pt-0.8 % Re/WO<sub>3</sub>/ZrO<sub>2</sub> (20 nm) catalysts.

### 3. The catalytic performance comparison of glycerol hydrogenolysis between 2Pt/WO<sub>3</sub>/ZrO<sub>2</sub> and 1.5Pt-0.8Re/WO<sub>3</sub>/ZrO<sub>2</sub> catalysts (Figure 1 in text)

**Table S1** Catalytic performance of glycerol hydrogenolysis over 2% Pt/WO<sub>3</sub>/ZrO<sub>2</sub> and 1.5 % Pt-0.8 % Re /WO<sub>3</sub>/ZrO<sub>2</sub> catalysts<sup>a</sup>

| Entry          | Gl.Conv. <sup>b</sup><br>(mol%) | C3 alcohols selectivity (mol%) |         |      |      |       | Others<br>selectivity <sup>c</sup><br>(mol%) |
|----------------|---------------------------------|--------------------------------|---------|------|------|-------|----------------------------------------------|
|                |                                 | 1,3-PDO                        | 1,2-PDO | 1-PO | 2-PO | Total |                                              |
| 1 <sup>d</sup> | 57.7                            | 28.9                           | 14.6    | 46.9 | 6.4  | 96.8  | 3.2                                          |
| 2 <sup>e</sup> | 68.2                            | 25.9                           | 27.3    | 34.4 | 6.8  | 95.7  | 4.3                                          |

<sup>a</sup> Data after 14 h reaction; reaction conditions: 2g catalysts, 10 wt.% glycerol aqueous solution, H<sub>2</sub> pressure=2.5 MPa, reaction temperature=175 °C, WHSV=0.12 h<sup>-1</sup>; <sup>b</sup> glycerol conversion; <sup>c</sup> others: acetone, propionate acid and ethylene glycerol; <sup>d</sup> 2 % Pt/WO<sub>3</sub>/ZrO<sub>2</sub> catalyst; <sup>e</sup> 1.5 % Pt-0.8 % Re/WO<sub>3</sub>/ZrO<sub>2</sub> catalyst.

#### 4. Catalytic performance of glycerol hydrogenolysis over 2Pt-Re/WO<sub>3</sub>/ZrO<sub>2</sub> catalysts (Figures 2-3 in text)

**Table S2** Catalytic performance of glycerol hydrogenolysis over 2 % Pt-Re/WO<sub>3</sub>/ZrO<sub>2</sub> catalysts <sup>a</sup>

| Entry          | xRe<br>(wt. %) | Gl.Conv. <sup>b</sup><br>(mol%) | C3 alcohols selectivity (mol%) |         |      |      |       | Others<br>selectivity <sup>c</sup><br>(mol%) |
|----------------|----------------|---------------------------------|--------------------------------|---------|------|------|-------|----------------------------------------------|
|                |                |                                 | 1,3-PDO                        | 1,2-PDO | 1-PO | 2-PO | Total |                                              |
| 1              | 0              | 57.7                            | 28.9                           | 14.6    | 46.9 | 6.4  | 96.8  | 3.2                                          |
| 2              | 0.10           | 99.9                            | 16.5                           | 8.4     | 60.4 | 10.4 | 95.7  | 4.3                                          |
| 3              | 0.36           | 99.7                            | 18.8                           | 12.1    | 53.3 | 10.8 | 95.0  | 5.0                                          |
| 4              | 0.80           | 99.0                            | 20.4                           | 13.4    | 51.3 | 10.5 | 95.6  | 4.4                                          |
| 5              | 1.00           | 69.9                            | 15.9                           | 14.8    | 54.6 | 9.4  | 94.7  | 5.3                                          |
| 6              | 2.00           | 67.3                            | 9.4                            | 33.7    | 39.4 | 12.6 | 95.1  | 4.9                                          |
| 7 <sup>d</sup> | 2.00           | 11.6                            | 0.6                            | 84.6    | 3.3  | 2.3  | 93.7  | 6.3                                          |

<sup>a</sup> Data after 14 h reaction; reaction conditions: 2g catalysts, 10 wt.% glycerol aqueous solution, H<sub>2</sub> pressure=2.5 MPa, reaction temperature=175 °C, WHSV=0.12 h<sup>-1</sup>; <sup>b</sup> glycerol conversion; <sup>c</sup> others: acetone, propionate acid and ethylene glycerol; <sup>d</sup> 2 % Re/WO<sub>3</sub>/ZrO<sub>2</sub> catalyst.

#### 5. Catalytic performance of glycerol hydrogenolysis over 2Pt-0.8Re/WO<sub>3</sub>/ZrO<sub>2</sub> catalysts under different reaction temperatures (Figure 4 in text)

**Table S3** Catalytic performance of glycerol hydrogenolysis over 2 % Pt-0.8 % Re/WO<sub>3</sub>/ZrO<sub>2</sub> catalysts under different reaction temperature <sup>a</sup>

| Entry | t (°C) <sup>b</sup> | Gl.Conv. <sup>c</sup><br>(mol%) | C3 alcohols selectivity (mol%) |         |      |      |       | Others selectivity <sup>d</sup><br>(mol%) |
|-------|---------------------|---------------------------------|--------------------------------|---------|------|------|-------|-------------------------------------------|
|       |                     |                                 | 1,3-PDO                        | 1,2-PDO | 1-PO | 2-PO | Total |                                           |
| 1     | 135                 | 6.4                             | 40.4                           | 21.0    | 25.2 | 6.2  | 92.9  | 7.1                                       |
| 2     | 155                 | 30.5                            | 37.9                           | 9.2     | 42.6 | 7.6  | 97.3  | 2.7                                       |
| 3     | 165                 | 45.7                            | 29.8                           | 9.6     | 49.4 | 8.3  | 97.2  | 2.8                                       |
| 4     | 170                 | 56.2                            | 26.2                           | 12.9    | 47.3 | 8.9  | 95.3  | 4.7                                       |
| 5     | 175                 | 99.0                            | 20.4                           | 13.4    | 51.3 | 10.5 | 95.6  | 4.4                                       |

<sup>a</sup> Data after 14 h reaction; reaction conditions: 2g catalysts, 10 wt.% glycerol aqueous solution, H<sub>2</sub> pressure=2.5 MPa, WHSV=0.12 h<sup>-1</sup>; <sup>b</sup> reaction temperature; <sup>c</sup> glycerol conversion; <sup>d</sup> others: acetone, propionate acid and ethylene glycerol.

## 6. Catalytic performance of glycerol hydrogenolysis over 2Pt-0.8Re/WO<sub>3</sub>/ZrO<sub>2</sub> catalysts under different H<sub>2</sub> pressure (Figure 5 in text)

**Table S4** Catalytic performance of glycerol hydrogenolysis over 2 % Pt-0.8 % Re/WO<sub>3</sub>/ZrO<sub>2</sub> catalysts under different H<sub>2</sub> pressure <sup>a</sup>

| Entry | P. <sup>b</sup>  | Gl.Conv. <sup>c</sup><br>(mol%) | C3 compounds selectivity (mol%) |         |      |      |        |       | Others selectivity <sup>d</sup><br>(mol%) |
|-------|------------------|---------------------------------|---------------------------------|---------|------|------|--------|-------|-------------------------------------------|
|       |                  |                                 | 1,3-PDO                         | 1,2-PDO | 1-PO | 2-PO | acetol | Total |                                           |
| 1     | 0.1 <sup>e</sup> | 96.8                            | 1.8                             | 13.7    | 13.4 | 3.2  | 63.1   | 95.2  | 4.8                                       |
| 2     | 0.5              | 99.7                            | 19.1                            | 28.6    | 24.4 | 7.1  | 12.8   | 92.0  | 8.0                                       |
| 3     | 1.0              | 94.8                            | 15.8                            | 31.7    | 37.4 | 7.8  | 2.6    | 95.4  | 4.6                                       |
| 4     | 1.5              | 99.1                            | 20.4                            | 32.3    | 35.4 | 6.3  | 1.8    | 96.3  | 3.7                                       |
| 5     | 2.0              | 99.6                            | 20.8                            | 27.8    | 40.0 | 5.9  | 0.7    | 95.3  | 4.7                                       |
| 6     | 2.5              | 99.0                            | 20.4                            | 13.4    | 51.3 | 10.5 | /      | 95.6  | 4.4                                       |

<sup>a</sup> Data after 14 h reaction; reaction conditions: 2g catalysts, 10 wt.% glycerol aqueous solution, reaction temperature=175 °C, WHSV=0.12 h<sup>-1</sup>; <sup>b</sup> H<sub>2</sub> pressure; <sup>c</sup> glycerol conversion; <sup>d</sup> others: acetone, propionate acid and ethylene glycerol. <sup>e</sup> Atmospheric pressure.

## 7. Catalytic performance of glycerol hydrogenolysis over 2Pt/WO<sub>3</sub>/ZrO<sub>2</sub> and 2Pt-0.8Re/WO<sub>3</sub>/ZrO<sub>2</sub> catalysts under N<sub>2</sub> atmosphere (Figure 6 in text)

**Table S5** Catalytic performance of glycerol hydrogenolysis over 2 % Pt/WO<sub>3</sub>/ZrO<sub>2</sub> and 2 % Pt-0.8 % Re/WO<sub>3</sub>/ZrO<sub>2</sub> catalysts under N<sub>2</sub> atmosphere <sup>a</sup>

| Entry | catalysts                                   | Gl. Conv. <sup>b</sup><br>(mol%) | C3 compounds selectivity (mol%) |         |      |      |        |        |       | Others selectivity (mol%) <sup>c</sup> |
|-------|---------------------------------------------|----------------------------------|---------------------------------|---------|------|------|--------|--------|-------|----------------------------------------|
|       |                                             |                                  | 1,3-PDO                         | 1,2-PDO | 1-PO | 2-PO | actone | acetol | Total |                                        |
| 1     | 2Pt/WO <sub>3</sub> /ZrO <sub>2</sub>       | 19.6                             | /                               | 35.1    | 4.7  | 13.6 | 10.7   | 26.4   | 90.5  | 9.5                                    |
| 2     | 2Pt-0.8Re/WO <sub>3</sub> /ZrO <sub>2</sub> | 18.9                             | 1.4                             | 21.4    | 10.3 | 12.2 | 27.9   | 17.8   | 91.0  | 9.0                                    |

<sup>a</sup> Data after 14 h reaction; reaction conditions: 2g catalysts, 10 wt.% glycerol aqueous solution, reaction temperature = 175 °C, N<sub>2</sub> pressure=2.5 MPa, WHSV=0.12 h<sup>-1</sup>; <sup>b</sup> glycerol conversion; <sup>c</sup> others: propionate acid and ethylene glycerol, ethanol.

## 8. Comparison of the methods

As described in introduction part in text, although 1,3-PDO are important raw material in the synthesis of polytrimethylene terephthalate (PTT), the other C3 alcohols and acetol are also useful chemicals in industrial production. 1-PO, the major product of this article with > 50% selectivity (Table S1, entry 4), is also very important an important solvent or starting material in pesticide, medicine and perfume industries and its **market demand** is growing fast in recent years. Therefore, **total selectivity of C3 alcohol** is a very important parameter to evaluate the catalysts. Low total selectivity of C3 alcohol means the generation of large amount of wastes, which is **not allowed** in large-scale production. In this work (Table S2, entry 23), we got >95% total C3 alcohol selectivity. Compared with reported works that reached the similar technical level (C3 alcohol selectivity >90%, Table S2, entries 3, 5, 6-7, 9, 12-13, 17-22), the **glycerol conversion** of our work (>99%) is higher than all of them. The complete glycerol conversion of our work leads to high capacity in industrial production, which is also very important factor. In addition, our work requires the **lowest H<sub>2</sub> pressure** (2.5 MPa, Table S2, entries 23 vs. 1-22), which reduces the equipment requirements and energy consumption. Reference in Table S2, entry 20 obtained the highest 1,3-PDO selectivity (60.4%) and excellent C3 alcohol selectivity (99.6%), but unfortunately, the glycerol conversion was very low (33.1%).

**Table S6** comparison of the methods

| Entry | Catlysts                                      | P (MPa) <sup>a</sup> | C (%) <sup>c</sup> | 1,3-PDO (%) <sup>d</sup> | C3 (%) <sup>e</sup> | Ref. <sup>f</sup> |
|-------|-----------------------------------------------|----------------------|--------------------|--------------------------|---------------------|-------------------|
| 1     | 2% Pt/19.6% WO <sub>3</sub> /ZrO <sub>2</sub> | 8.0                  | 78.4               | 24                       | 64.2                | 3a                |
| 2     | 3% Pt/10% WO <sub>3</sub> /ZrO <sub>2</sub>   | 4.0                  | 70.2               | 45.6                     | 70.1                | 3b                |
| 3     | 5% Pt/W/ZrSi                                  | 5.0                  | 54.3               | 52.9                     | 97.6                | 3c                |
| 4     | 2% Pt/WO <sub>3</sub> /ZrO <sub>2</sub>       | 5.5                  | 31.6               | 34.9                     | 64.0                | 4a                |
| 5     | 5.7 %Pt-4.6 %Re/C                             | 4.0                  | 20.0               | 34                       | 100                 | 4b                |

|    |                                                                                         |             |      |      |      |           |
|----|-----------------------------------------------------------------------------------------|-------------|------|------|------|-----------|
| 6  | 2% Pt/ASA                                                                               | 4.5         | 19.8 | 4.5  | 90.2 | 4c        |
| 7  | 2%Pt/WO <sub>3</sub> /TiO <sub>2</sub> /SiO <sub>2</sub>                                | 5.5         | 15.3 | 50.5 | 93.6 | 4d        |
| 8  | 2% Pt/ Mesoporous WO <sub>3</sub>                                                       | 5.5         | 18.0 | 39.3 | 84.3 | 4e        |
| 9  | 2% Pt-H <sub>4</sub> SiW <sub>12</sub> O <sub>40</sub> /SiO <sub>2</sub>                | 6.0         | 81.2 | 38.7 | >90  | 4f        |
| 10 | 5% Pt/A <sub>2</sub> O <sub>3</sub> +STA                                                | 4.0         | 49   | 28   | /    | 4h        |
| 11 | 2 % Pt/Ti <sub>80</sub> W <sub>20</sub>                                                 | 5.5         | 55.4 | 26.9 | 76.8 | 4i        |
| 12 | 2% Pt-H <sub>4</sub> SiW <sub>12</sub> O <sub>40</sub> /ZrO <sub>2</sub>                | 5.0         | 26.7 | 38.9 | 91.6 | 4j        |
| 13 | 2% Pt-15% <sub>H</sub> <sub>4</sub> SiW <sub>12</sub> O <sub>40</sub> /ZrO <sub>2</sub> | 5.0         | 24.1 | 48.1 | 90.9 | 4k        |
| 14 | 5% Pt-Re/CNTs                                                                           | 4.0         | 20.0 | ~21  | 82   | 4l        |
| 15 | 2% Pt/AlPO <sub>4</sub>                                                                 | vapor phase | 100  | 35.4 | 70.2 | 4m        |
| 16 | 9% Pt/8%WO <sub>x</sub> /Al <sub>2</sub> O <sub>3</sub>                                 | 4.5         | 53.1 | 51.9 | 86.2 | 4n        |
| 17 | 2% Pt-15%WO <sub>x</sub> /Al <sub>2</sub> O <sub>3</sub>                                | 5.0         | 53.4 | 58.9 | 92.0 | 4o        |
| 18 | 5% Rh/SiO <sub>2</sub> +Amberlyst                                                       | 8.0         | 14.3 | 9.8  | 90.9 | 5a        |
| 19 | 4% Rh-ReO <sub>x</sub> /SiO <sub>2</sub>                                                | 8.0         | 79.0 | 14.0 | 99.4 | 5b        |
| 20 | 4% Ir-ReO <sub>x</sub> /SiO <sub>2</sub> +H <sub>2</sub> SO <sub>4</sub>                | 8.0         | 33.1 | 60.4 | 99.6 | 6a        |
| 21 | 4% Ir-ReO <sub>x</sub> /SiO <sub>2</sub> + H-ZSM-5                                      | 8.0         | 58.8 | 44.7 | 98.7 | 6c        |
| 22 | Ru-4% Ir-ReO <sub>x</sub> /SiO <sub>2</sub>                                             | 8.0         | 65.8 | 36.9 | 99.4 | 6e        |
| 23 | 2% Pt-0.8% Re/5%WO <sub>3</sub> /ZrO <sub>2</sub>                                       | 2.5         | >99  | 20.4 | 95.6 | This work |

<sup>a</sup> H<sub>2</sub> pressure; <sup>b</sup> Reaction temperature; <sup>c</sup> glycerol conversion (%); <sup>d</sup> 1,3-PDO selectivity (%); <sup>e</sup> C3 alcohol selectivity (%); <sup>f</sup> Reference NO. cited in text.
